# Supplementary material for: Chemical Composition of Healthy and Raspberry Leaf Blotch Emaravirus-Infected Red Raspberry ‘Willamette’ Fruits
Source: Preprints.org preprint supplement (doi:10.20944/preprints202312.2039.v1), 2023-12-27
Supplement: Supplementary file 1 [file supplementary]

**Table S1.** Influence of the main variables and their interaction on polyphenolic profile of raspberry fruits.

| **Variables** | | **CA** | ***p*COU** | **FA** | **EA** |
| --- | --- | --- | --- | --- | --- |
| A  (viral status) | 1 (infected) | 7.9 ± 2.7 | 9.2 ± 8.7a | 8.1 ± 2.7b | 251.7 ± 121.6a |
| 2 (negative) | 7.6 ± 2.8 | 5.3 ± 2.8b | 8.8 ± 4.5a | 229.6 ± 127.1b |
| B  (harvest year) | 1 (2019) | 9.6 ± 2.3a | 6.7 ± 3.6b | 10.6 ± 4.1a | 161.6 ± 46.6b |
| 2 (2020) | 5.9 ± 1.6b | 7.8 ± 8.8a | 6.3 ± 1.2b | 319.7 ± 125.7a |
| C  (locality) | 1 (Bedina Varoš) | 5.9 ± 2.3c | 10.0 ± 10.2a | 7.6 ± 2.4b | 172.0 ± 37.9c |
| 2 (Devići) | 7.5 ± 2.2b | 5.4 ± 1.3c | 8.8 ± 3.0a | 210.7 ± 105.4b |
| 3 (Cerova) | 9.8 ± 2.1a | 6.3 ± 4.8b | 8.9 ± 5.2a | 339.3 ± 137.6a |
| A × B | 1 × 1 | 9.9 ± 1.8 | 7.7 ± 3.9b | 9.5 ± 3.1b | 182.2 ± 42.0b |
| 1 × 2 | 5.8 ± 1.7 | 10.7 ± 11.8a | 6.7 ± 1.4c | 321.2 ± 137.1a |
| 1 × 3 | 9.3 ± 2.8 | 5.7 ± 3.3c | 11.7 ± 4.8a | 141.1 ± 43.6c |
| 1 × 4 | 5.9 ± 1.6 | 4.8 ± 2.5c | 5.9 ± 0.9c | 318.2 ± 121.6a |
| A × C | 1 × 1 | 6.5 ± 3.2bc | 15.2 ± 12.3a | 9.5 ± 1.7b | 203.5 ± 13.0d |
| 1 × 2 | 7.3 ± 1.6b | 5.2 ± 1.3c | 9.0 ± 3.4b | 189.2 ± 65.1d |
| 1 × 3 | 9.8 ± 2.3a | 7.2 ± 6.0b | 5.7 ± 0.6c | 362.4 ± 153.9a |
| 2 × 1 | 5.2 ± 1.0c | 4.8 ± 3.4c | 5.7 ± 1.1c | 140.5 ± 24.7e |
| 2 × 2 | 7.7 ± 2.8b | 5.6 ± 1.4c | 8.6 ± 2.8b | 232.3 ± 138.1c |
| 2 × 3 | 9.9 ± 2.2a | 5.5 ± 3.6c | 12.0 ± 6.0a | 316.2 ± 129.2b |
| B × C | 1 × 1 | 7.5 ± 2.2 | 2.9 ± 1.5de | 8.6 ± 2.6b | 156.4 ± 42.1e |
| 1 × 2 | 9.4 ± 1.1 | 6.6 ± 0.4c | 11.6 ± 0.8a | 118.2 ± 13.8f |
| 1 × 3 | 11.9 ± 0.5 | 10.6 ± 2.6b | 11.6 ± 6.5a | 210.3 ± 16.9c |
| 2 × 1 | 4.2 ± 0.6 | 17.1 ± 10.2a | 6.6 ± 2.0c | 187.6 ± 28.5d |
| 2 × 2 | 5.6 ± 0.8 | 4.2 ± 0.2d | 6.0 ± 0.3c | 303.3 ± 60.8b |
| 2 × 3 | 7.8 ± 0.2 | 2.1 ± 0.3e | 6.2 ± 0.8c | 468.2 ± 38.3a |

**Table S1 continued**

| **Variables** | | **RUT** | **ISO-Q** | **Q3-RHA** | **Q** |
| --- | --- | --- | --- | --- | --- |
| A  (viral status) | 1 (infected) | 109.2 ± 35.8a | 51.5 ± 12.9a | 55.5 ± 20.7 | 13.3 ± 15.2 |
| 2 (negative) | 73.0 ± 21.2b | 39.2 ± 19.6b | 55.9 ± 19.1 | 13.4 ± 15.8 |
| B  (harvest year) | 1 (2019) | 99.2 ± 28.8a | 34.5 ± 10.4b | 55.3 ± 13.5b | 7.6 ± 2.6b |
| 2 (2020) | 83.0 ± 38.2b | 56.2 ± 16.4a | 57.1 ± 24.7a | 19.1 ± 20.1a |
| C  (locality) | 1 (Bedina Varoš) | 103.7 ± 48.0a | 44.0 ± 11.1b | 72.7 ± 9.2a | 27.9 ± 19.7a |
| 2 (Devići) | 65.8 ± 7.8b | 49.8 ± 19.5a | 38.8 ± 13.0c | 6.6 ± 2.3b |
| 3 (Cerova) | 103.8 ± 18.6a | 42.2 ± 20.8b | 57.2 ± 18.5b | 5.6 ± 0.6c |
| A × B | 1 × 1 | 113.8 ± 33.6a | 41.5 ± 7.1c | 53.8 ± 10.8c | 7.7 ± 2.0 |
| 1 × 2 | 104.6 ± 39.4b | 61.5 ± 8.7a | 59.2 ± 27.9a | 18.8 ± 20.4 |
| 1 × 3 | 84.6 ± 12.3c | 27.4 ± 8.3d | 56.8 ± 16.4b | 7.5 ± 3.2 |
| 1 × 4 | 61.4 ± 22.4d | 51.0 ± 20.8b | 55.0 ± 22.6bc | 19.3 ± 21.0 |
| A × C | 1 × 1 | 144.3 ± 5.6a | 54.1 ± 4.4a | 73.0 ± 10.8a | 26.3 ± 21.6b |
| 1 × 2 | 63.0 ± 9.7d | 45.7 ± 9.6b | 31.2 ± 9.4e | 7.9 ± 2.7c |
| 1 × 3 | 120.4 ± 7.3b | 54.6 ± 19.8a | 65.3 ± 7.7b | 5.6 ± 0.7d |
| 2 × 1 | 63.2 ± 32.8d | 34.0 ± 2.6c | 72.4 ± 8.2a | 29.5 ± 19.6a |
| 2 × 2 | 68.6 ± 4.5d | 53.8 ± 26.6a | 46.3 ± 12.1d | 5.3 ± 0.4d |
| 2 × 3 | 87.3 ± 7.1c | 29.8 ± 14.0d | 49.1 ± 23.2c | 5.6 ± 0.4d |
| B × C | 1 × 1 | 119.4 ± 29.5a | 43.2 ± 8.6c | 64.1 ± 1.3b | 9.1 ± 2.9b |
| 1 × 2 | 70.4 ± 3.3d | 33.3 ± 4.3d | 37.5 ± 3.1d | 7.8 ± 2.8b |
| 1 × 3 | 107.9 ± 19.0b | 26.9 ± 10.7e | 64.3 ± 6.6b | 6.0 ± 0.4c |
| 2 × 1 | 88.1 ± 60.0c | 45.0 ± 13.9c | 81.3 ± 2.2a | 46.7 ± 1.5a |
| 2 × 2 | 61.2 ± 8.4d | 66.2 ± 13.2a | 39.9 ± 19.0d | 5.4 ± 0.4c |
| 2 × 3 | 99.8 ± 19.0b | 57.6 ± 16.6b | 50.1 ± 24.3c | 5.2 ± 0.3c |

**Table S1 continued**

| **Variables** | | **KAE** | **CY3-GLU** | **CY3-SOP** | **PHENOL** |
| --- | --- | --- | --- | --- | --- |
| A  (viral status) | 1 (infected) | 10.6 ± 4.8a | 62.0 ± 45.3a | 284.8 ± 207.7a | 289.4 ± 32.4 |
| 2 (negative) | 9.7 ± 4.3b | 57.3 ± 28.0b | 246.7 ± 114.6b | 289.3 ± 33.6 |
| B  (harvest year) | 1 (2019) | 12.9 ± 3.5a | 88.3 ± 30.2a | 400.9 ± 130.6a | 309.1 ± 29.0a |
| 2 (2020) | 7.4 ± 3.7b | 31.0 ± 14.2b | 130.6 ± 36.9b | 269.6 ± 22.5b |
| C  (locality) | 1 (Bedina Varoš) | 14.6 ± 2.8a | 68.6 ± 44.3a | 284.9 ± 196.5b | 279.5 ± 18.3b |
| 2 (Devići) | 9.4 ± 3.2b | 39.2 ± 19.2b | 188.5 ± 91.2c | 290.9 ± 42.5b |
| 3 (Cerova) | 6.4 ± 3.0c | 71.2 ± 37.2a | 313.8 ± 177.1a | 307.7 ± 25.9a |
| A × B | 1 × 1 | 13.6 ± 3.7 | 100.3 ± 31.2a | 467.4 ± 128.4a | 304.4 ± 36.0b |
| 1 × 2 | 7.7 ± 3.9 | 23.6 ± 9.0d | 102.2 ± 17.1d | 274.3 ± 20.6c |
| 1 × 3 | 12.2 ± 3.4 | 76.3 ± 25.2b | 334.4 ± 99.1b | 313.8 ± 21.1a |
| 1 × 4 | 7.2 ± 3.7 | 38.4 ± 15.0c | 159.0 ± 28.1c | 264.8 ± 24.5d |
| A × C | 1 × 1 | 15.3 ± 3.3 | 74.0 ± 64.7a | 344.8 ± 273.5a | 263.7 ± 6.1c |
| 1 × 2 | 9.8 ± 3.2 | 41.5 ± 23.1c | 196.0 ± 119.1d | 296.5 ± 46.6ab |
| 1 × 3 | 6.9 ± 3.6 | 70.5 ± 38.9ab | 313.5 ± 207.7b | 307.9 ± 9.6a |
| 2 × 1 | 14.0 ± 2.4 | 63.2 ± 8.8b | 245.1 ± 64.8c | 295.2 ± 10.2b |
| 2 × 2 | 9.1 ± 3.5 | 36.9 ± 16.2c | 181.0 ± 63.0e | 265.3 ±34.9c |
| 2 × 3 | 6.0 ± 2.5 | 72.0 ± 39.1a | 314.1 ± 160.8b | 307.4 ± 37.2ab |
| B × C | 1 × 1 | 17.1 ± 1.6 | 101.4 ± 35.0a | 449.2 ± 159.2b | 281.6 ± 24.3b |
| 1 × 2 | 12.4 ± 0.6 | 56.9 ± 7.2b | 271.5 ± 36.8 c | 317.4 ± 24.7a |
| 1 × 3 | 9.2 ± 1.1 | 106.7 ± 4.1a | 481.9 ± 24.0a | 328.3 ± 15.4a |
| 2 × 1 | 12.2 ± 0.9 | 35.8 ± 22.8c | 140.7 ± 50.0d | 277.3 ± 11.7b |
| 2 × 2 | 6.4 ± 0.7 | 21.4 ± 1.3d | 105.5 ± 20.2e | 244.4 ± 13.0c |
| 2 × 3 | 3.7 ± 0.3 | 35.7 ± 1.4c | 145.7 ± 24.1d | 287.0 ± 14.7b |

**Table S1 continued**

| **Variables** | | ANTHO |
| --- | --- | --- |
| A  (viral status) | 1 (infected) | 82.2 ± 16.0 |
| 2 (negative) | 86.1 ± 27.2 |
| B  (harvest year) | 1 (2019) | 97.7 ± 23.0a |
| 2 (2020) | 74.6 ± 13.5b |
| C  (locality) | 1 (Bedina Varoš) | 83.8 ± 15.8b |
| 2 (Devići) | 75.6 ± 20.2b |
| 3 (Cerova) | 100.1 ± 23.1a |
| A × B | 1 × 1 | 90.2 ± 18.3b |
| 1 × 2 | 82.3 ± 13.2b |
| 1 × 3 | 105.2 ± 25.8a |
| 1 × 4 | 66.9 ± 9.1c |
| A × C | 1 × 1 | 78.0 ± 14.1cd |
| 1 × 2 | 84.4 ± 21.0bc |
| 1 × 3 | 96.3 ± 5.0ab |
| 2 × 1 | 87.5 ± 17.2bc |
| 2 × 2 | 66.9 ± 10.7d |
| 2 × 3 | 103.8 ± 33.5a |
| B × C | 1 × 1 | 85.8 ± 21.3b |
| 1 × 2 | 91.1 ± 17.1b |
| 1 × 3 | 116.2 ± 20.5a |
| 2 × 1 | 79.7 ± 8.5b |
| 2 × 2 | 60.2 ± 5.8c |
| 2 × 3 | 84.0 ± 11.4b |
